# Supplementary material
Source: publisher figshare collection journal article supplement (https://gsapubs.figshare.com/ndownloader/files/31208419)
Supplement: Supplementary file 1 [file 31208419]

## Sheet: Info
This Supplemental Material accompanies
Craddock, J.P., and Malone, D.H., 2021, An overview of strains in the Sevier thin-skinned thrust
belt, Idaho and Wyoming, USA (latitude 42° N), in Craddock, J.P., Malone, D.H., Foreman, B.Z.,
and Konstantinou, A., eds., Tectonic Evolution of the Sevier-Laramide Hinterland, Thrust Belt,
and Foreland, and Postorogenic Slab Rollback (180–20 Ma): Geological Society of America Special
Paper 555, https://doi.org/10.1130/2021.2555(05).
Appendix S2

## Sheet: Paris
JPC 92	e1-LPS			e1-LNS			e1-Vein		e3-LPS			e3-LNS			e3-Vein
	78°, 2°			57°, 62°			349°, 82°		330°, 78°			276°, 8°			118°, 12°
	193°, 2°						45°, 82°		337°, 78°						163°, 31°
	181°, 5°						51°, 47°		298°, 79°						307°, 12°
	82°, 8°						272°, 8°		352°, 5°						3°, 8°
	83°, 1°								171°, 8°
	266°, 6°								351°, 6°

## Sheet: Meade
Allmendinger 1982
	e1-LPS	e1-LPS(NEV)		e1-LNS			e1-Vein		e3-LPS	e3-LNS (NEV)		e3-LNS			e3-Vein
	1°, 3°			93°, 46°			251°, 11°		177°, 81°			282°, 38°			0°, 39°
	266°, 28°			171°, 68°			353°, 2°		72°, 31°			72°, 3°			271°, 82°
	278°, 34°			35°, 42°			91°, 2°		168°,17°			205°, 44°			168°, 12°
	122°, 13°			172°, 76°			258°, 55°		1°, 45°			258°, 5°			0°, 12°
	258°, 9°			331°, 41°			12°, 31°		86°, 61°			151°, 24°			274°, 12°
	265°, 10°			353°, 71°			271°, 5°		122°, 38°			142°, 13°			78°, 41°
	82°, 12°			252°, 46°			272°, 8°		326°, 61°			57°, 42°			173°, 8°
	3°, 82°			135°, 82°			276°, 24°		183°, 8°			274°, 8°			137°, 41°
	86°, 8°			331°, 82					252°, 58°			78°, 8°			262°, 31°
	88°, 13°			71°, 8°					308°, 38°			171°, 12°
	92°, 11°			38°, 81°					283°, 63°			121°, 18°
	83°, 13°								193°, 18°
	271°, 5°								35°, 26°
	305°, 27°								93°, 41°
	215°, 34°								93°, 16°
	323°, 33°								163°, 51°
	266°, 8°								26°, 29°
	93°, 42°								263°, 41°
Red=JPC	86°, 3°								354°, 8°
	274°, 18°								47°, 81°
	6°, 3°								328°, 5°
	182°, 3°								79°, 8°
	46°, 41°								331°, 12°
	63°, 71°								131°, 8°
	267°, 6°								38°, 61°
	21°, 6°								118°, 23°
	92°, 6°								172°, 46°

## Sheet: Crawford
	e1-LPS			e1-LNS			e1-Vein		e3-LPS			e3-LNS			e3-Vein
	243°, 85°						19°, 13°		12°, 3°						84°, 7°
	90°, 87°						186°, 86°		243°, 5°						47°, 7°
	186°, 59°								1°, 31°
	87°, 44°								271°, 38°
	1°, 82°								126°, 1°
	74°, 36°								278°, 28°
	249°, 61°								21°, 11°
	268°, 81°								214°, 2°
	117°, 68°								352°, 8°
	224°, 73°								12°, 21°
	266°, 83°								36°, 4°
	90°, 82°								1°, 2°
	112°, 84°								262°, 8°

## Sheet: Absaroka
JPC=black(n=20)		Apotria (n=8)	Kraig (n=18)	DVW-Haystack(n=8)		JPC-Haystack (n=2)
	e1-LPS	e1-LPS(NEV)		e1-LNS			e1-Vein		e3-LPS	e3-LNS (NEV)		e3-LNS			e3-Vein
	302°, 32°	102°, 53°		155°, 49°			137°, 5°		209°, 3°	211°, 12°		38°, 49°			186°, 84°
	230°, 40°	34°, 6°		187°, 68°			93°, 7°		78°, 43°	112°, 15°		72°, 5°			273°, 3°
	91°, 33°	203°, 36°					88°, 1°		349°, 17°	34°, 41°					336°, 10°
	201°, 12°						91°, 16°		303°, 46°						352°, 22°
	270°, 26°						65°, 17°		93°, 64°						192°, 26°
	347°, 2°						78°, 57°		84°, 73°						87°, 11°
	193°, 13°						336°, 62°		65°, 70°
	83°, 10°						268°, 8°		178°, 25°
	18°, 15°						86°, 1°		172°, 42°
	268°, 52°						196°, 5°		13°, 6°
	248°, 11°						171°, 82°		161°, 5°
	244°, 7°						91°, 2°		2°, 36°
	216°, 33°						330°, 12°		351°, 48°
	96°, 16°						352°, 6°		189°, 3°
	267°, 28°								46°, 52°
	219°, 53°								302°, 8°
	235°, 1°								21°, 83°
	267°, 5°								173°, 14°
	179°, 8°								268°, 4°
	246°, 21°								346°, 12°
	243°, 21°								88°, 67°
	88°, 81°								182°, 6°
	235°, 44°								112°, 27°
	270°, 28°								172°, 18°
	79°, 36°								212°, 26°
	261°, 2°								127°, 81°
	163°, 71°								51°, 23°
	271°, 2°								127°, 81°
	269°, 5°								31°, 46°
	57°, 28°								171°, 13°
	212°, 15°								308°, 14°
	181°, 5°								31°, 81°
	277°, 20°								12°, 31°
	269°, 5°								352°, 12°
	231°, 32°								88°, 21°
	76°, 3°								172°, 12°
	337°, 41°								96°, 5°

## Sheet: Darby
	e1-LPS	e1-LPS(NEV)		e1-LNS			e1-Vein		e3-LPS	e3-LNS (NEV)		e3-LNS			e3-Vein
	281°, 26°	182°, 43°					171°, 8°		26°, 38°	184°, 47°					282°, 31°
	271°, 12°	93°, 2°					271°, 38°		179°, 6°	269°, 2°					352°, 6°
	266°, 5°								353°, 12°
	227°, 37°								138°, 21°
	272°, 62°								86°, 4°
	93°, 2°								184°, 47°
	221°, 58°								2°, 8°
	271°, 4°								182°, 6°
	182°, 43°								269°, 2°

## Sheet: Lander
	e1-LPS	e1-LPS(NEV)		e1-LNS			e1-Vein		e3-LPS	e3-LNS (NEV)		e3-LNS			e3-Vein
	117°, 49°	47°, 72°		356°,12°					259°, 8°	292°, 8°		212°, 78°
	271°, 21°								356°, 8°
	341°, 26°								93°, 38°

## Sheet: Prospect
	e1-LPS			e1-Vein		e3-LPS			e3-Vein
	264°, 52°			91°, 2°		101°, 2°			334°, 82°
	271°, 8°			87°, 5°		163°, 5°			337°, 82°
	270°, 12°			331°, 9°		1°, 8°			118°, 83°
	92°, 6°					353°, 6°
	267°, 8°					350°, 12°
	86°, 82°					6°, 8°
	126°, 28°					17°, 68°
	243°, 36°					339°, 11°

## Sheet: Foreland
Cretaceous Greenhorn LS, Minnesota
	e1-LPS			e1-LNS			e1-Vein		e3-LPS			e3-LNS			e3-Vein
	87°, 0°								245°, 85°
	67°, 0°								171°, 84°
	130°, 0°								347°, 85°

## Sheet: ALL
Paris=red		Meade=Green		Crawford=Orange		Absaroka=Purple		Darby=Blue		Lander klippe=Black		Prospect=Maroon
	e1-LPS	e1-LPS(NEV)		e1-LNS			e1-Vein		e3-LPS	e3-LNS (NEV)		e3-LNS			e3-Vein
	78°, 2°	102°, 53°		57°, 62°			349°, 82°		330°, 78°	211°, 12°		276°, 8°			118°, 12°
	193°, 2°	34°, 6°		93°, 46°			45°, 82°		337°, 78°	112°, 15°		282°, 38°			163°, 31°
	181°, 5°	203°, 36°		171°, 68°			51°, 47°		298°, 79°	34°, 41°		72°, 3°			307°, 12°
	82°, 8°	182°, 43°		35°, 42°			272°, 8°		352°, 5°	184°, 47°		205°, 44°			3°, 8°
	83°, 1°	93°, 2°		172°, 76°			251°, 11°		171°, 8°	269°, 2°		258°, 5°			0°, 39°
	266°, 6°	47°, 72°		331°, 41°			353°, 2°		351°, 6°	292°, 8°		151°, 24°			271°, 82°
	1°, 3°			353°, 71°			91°, 2°		177°, 81°			142°, 13°			168°, 12°
	266°, 28°			252°, 46°			258°, 55°		72°, 31°			57°, 42°			0°, 12°
	278°, 34°			135°, 82°			12°, 31°		168°,17°			274°, 8°			274°, 12°
	122°, 13°			331°, 82			271°, 5°		1°, 45°			78°, 8°			78°, 41°
	258°, 9°			71°, 8°			272°, 8°		86°, 61°			171°, 12°			173°, 8°
	265°, 10°			38°, 81°			276°, 24°		122°, 38°			121°, 18°			137°, 41°
	82°, 12°			155°, 49°			19°, 13°		326°, 61°			38°, 49°			262°, 31°
	3°, 82°			187°, 68°			186°, 86°		183°, 8°			72°, 5°			84°, 7°
	86°, 8°			356°,12°			137°, 5°		252°, 58°			212°, 78°			47°, 7°
	88°, 13°						93°, 7°		308°, 38°						186°, 84°
	92°, 11°						88°, 1°		283°, 63°						273°, 3°
	83°, 13°						91°, 16°		193°, 18°						336°, 10°
	271°, 5°						65°, 17°		35°, 26°						352°, 22°
	305°, 27°						78°, 57°		93°, 41°						192°, 26°
	215°, 34°						336°, 62°		93°, 16°						87°, 11°
	323°, 33°						268°, 8°		163°, 51°						282°, 31°
	266°, 8°						86°, 1°		26°, 29°						352°, 6°
	93°, 42°						196°, 5°		263°, 41°						334°, 82°
	86°, 3°						171°, 82°		354°, 8°						337°, 82°
	274°, 18°						91°, 2°		47°, 81°						118°, 83°
	6°, 3°						330°, 12°		328°, 5°
	182°, 3°						352°, 6°		79°, 8°
	46°, 41°						171°, 8°		331°, 12°
	63°, 71°						271°, 38°		131°, 8°
	267°, 6°						91°, 2°		38°, 61°
	21°, 6°						87°, 5°		118°, 23°
	92°, 6°						331°, 9°		172°, 46°
	243°, 85°								12°, 3°
	90°, 87°								243°, 5°
	186°, 59°								1°, 31°
	87°, 44°								271°, 38°
	302°, 32°								209°, 3°
	230°, 40°								78°, 43°
	91°, 33°								349°, 17°
	201°, 12°								303°, 46°
	270°, 26°								93°, 64°
	347°, 2°								84°, 73°
	193°, 13°								65°, 70°
	83°, 10°								178°, 25°
	18°, 15°								172°, 42°
	268°, 52°								13°, 6°
	248°, 11°								161°, 5°
	244°, 7°								2°, 36°
	216°, 33°								351°, 48°
	96°, 16°								189°, 3°
	267°, 28°								46°, 52°
	219°, 53°								302°, 8°
	235°, 1°								21°, 83°
	267°, 5°								173°, 14°
	179°, 8°								268°, 4°
	246°, 21°								346°, 12°
	243°, 21°								88°, 67°
	88°, 81°								182°, 6°
	235°, 44°								112°, 27°
	270°, 28°								172°, 18°
	79°, 36°								212°, 26°
	261°, 2°								127°, 81°
	163°, 71°								51°, 23°
	271°, 2°								127°, 81°
	269°, 5°								31°, 46°
	57°, 28°								171°, 13°
	212°, 15°								308°, 14°
	181°, 5°								31°, 81°
	277°, 20°								12°, 31°
	269°, 5°								352°, 12°
	231°, 32°								88°, 21°
	76°, 3°								172°, 12°
	337°, 41°								96°, 5°
	281°, 26°								26°, 38°
	271°, 12°								179°, 6°
	266°, 5°								353°, 12°
	227°, 37°								138°, 21°
	272°, 62°								86°, 4°
	93°, 2°								184°, 47°
	221°, 58°								2°, 8°
	271°, 4°								182°, 6°
	182°, 43°								269°, 2°
	117°, 49°								259°, 8°
	271°, 21°								356°, 8°
	341°, 26°								93°, 38°
	264°, 52°								101°, 2°
	271°, 8°								163°, 5°
	270°, 12°								1°, 8°
	92°, 6°								353°, 6°
	267°, 8°								350°, 12°
	86°, 82°								6°, 8°
	126°, 28°								17°, 68°
	243°, 36°								339°, 11°
	1°, 82°								126°, 1°
	74°, 36°								278°, 28°
	249°, 61°								21°, 11°
	268°, 81°								214°, 2°
	117°, 68°								352°, 8°
	224°, 73°								12°, 21°
	266°, 83°								36°, 4°
	90°, 82°								1°, 2°
	112°, 84°								262°, 8°

[truncated: 1 more sheets: Jr-K CTA]
